# Supplementary material for: Impact of COVID 19 Vaccination on Long COVID Symptoms in Ecuador a Nationwide Cross Sectional Study
Source: Research Square preprint supplement (doi:10.21203/rs.3.rs-5968498/v1), 2025-04-22
Supplement: Supplementary file 1 [file 5f86b0ee0403597c487ac421.pdf]

# **CUESTIONARIO PARA EVALUAR LONG-COVID Y ESTADO DE VACUNACIÓN EN ECUADOR**

## **SECCIÓN 1: Consentimiento informado**

Este formulario de consentimiento informado está dirigido a los ciudadanos ecuatorianos, quienes participarán en el estudio denominado “Long-COVID y estado de vacunación en Ecuador”.

### **Tesista:**

Md. Santiago Israel Bravo Loaiza

### **Director:**

Prof. Sunjoo Kang PhD

### **Introducción:**

Yo, Santiago Israel Bravo Loaiza, estudiante del programa de maestría de Control de Enfermedades Infecciosas de la Escuela de Salud Pública en Universidad Yonsei en Corea del Sur, portador de la cédula de identidad 1105108276, me encuentro realizando una investigación sobre síntomas persistentes post COVID-19 en ciudadanos de Ecuador y su relación con el estado de vacunación. Solicito me brinde su autorización para la ejecución del presente estudio y, a la vez, pongo a su disposición información pertinente acerca del mismo. Si tiene dudas, responderé a cada una de ellas.

### **Propósito:**

Investigar la asociación entre la vacunación para COVID-19 y el riesgo para desarrollar Long-COVID en Ecuador.

### **Tipo de intervención de la investigación:**

Esta investigación incluirá la aplicación de un cuestionario relacionado a evaluar los síntomas persistentes post COVID-19 así como datos personales y antecedentes clínicos.

**Selección de participantes:**

Las personas que han sido seleccionadas, son ciudadanos ecuatorianos adultos con antecedente de infección por COVID-19, que quieran participar voluntariamente.

**Confidencialidad:**

Toda la información obtenida será manejada con absoluta confidencialidad. Los datos de filiación serán utilizados, exclusivamente, para garantizar la veracidad de los mismos y a estos solo tendrán acceso los organismos evaluadores de la Universidad Yonsei.

**Costo:**

Su participación dentro del presente proyecto de investigación será totalmente voluntaria y no tendrá costo alguno.

**Resultados:**

La información que fue motivo de la investigación, será socializada en el repositorio digital de la Universidad Yonsei. No se divulgará información personal.

**Derecho a negarse o retirarse:**

Si ha leído el presente documento y ha decidido participar en el presente estudio, entiéndase que su participación es voluntaria y que usted tiene derecho de abstenerse del estudio en cualquier momento del mismo sin ningún tipo de penalidad. Tiene del mismo modo derecho a no contestar alguna pregunta en particular, si así lo considera.

**A quien contactar:**

Santiago Israel Bravo Loaiza.

Correo: santibl96@gmail.com

## **CONSENTIMIENTO**

He sido informado/a de manera muy clara y oportuna sobre esta investigación. Entiendo que no sufriré daño alguno a mi persona. Soy consciente de los beneficios que se obtendrá con la aportación en este proyecto. Se me ha proporcionado el nombre de la investigadora. Consiento voluntariamente participar en esta investigación como participante.

1. ¿Acepta participar en la presente investigación?

- ☐ Si
- ☐ No

## SECCIÓN 2: Datos demográficos y antecedentes clínicos

2. Edad: \_\_\_\_\_
3. ¿Cuál es su sexo biológico?
  - ☐ Masculino
  - ☐ Femenino
  - ☐ Preferiero no contestar
4. ¿A qué grupo étnico pertenece?
  - ☐ Mestizo
  - ☐ Blanco
  - ☐ Indígea
  - ☐ Afrodescendiente
  - ☐ Montubio
  - ☐ Otro
5. ¿Cuál es su ocupación?
  - ☐ Gestión y negocios.
  - ☐ Informática y matemáticas.
  - ☐ Arquitectura e ingeniería.
  - ☐ Trabajadores sociales y comunitarios.
  - ☐ Ocupaciones legales.
  - ☐ Instrucción educativa.
  - ☐ Arte, diseño y entretenimiento.
  - ☐ Profesionales de la salud.
  - ☐ Ocupaciones de apoyo a la atención sanitaria.
  - ☐ Ocupaciones y servicios de protección.
  - ☐ Preparación de alimentos y comidas.
  - ☐ Limpieza y mantenimiento.
  - ☐ Cuidado personal.
  - ☐ Ventas y ocupaciones similares.
  - ☐ Oficinistas y apoyo administrativo.

- Ocupaciones agrícolas, pesqueras y forestales.
- Construcción.
- Trabajadores en procesos de instalación, mantenimiento y reparación.
- Ocupaciones en los procesos productivos.
- Transporte.
- Estudiante.
- Político.
- Desempleo.
- Jubilación.
- Geocientíficos.
- Científicos sociales y ocupaciones afines.
- Biólogos, químicos y ocupaciones afines.
- Tareas del hogar.
- Artesanía.

6. Provincia de residencia

- Azuay.
- Bolívar.
- Cañar.
- Carchi.
- Chimborazo.
- Cotopaxi.
- El Oro.
- Esmeraldas.
- Galápagos.
- Guayas.
- Imbabura.
- Loja.
- Los Ríos.
- Manabí.

- ☐ Morona Santiago.
- ☐ Napo.
- ☐ Orellana.
- ☐ Pastaza.
- ☐ Pichincha.
- ☐ Santa Elena.
- ☐ Santo Domingo de los Tsáchilas.
- ☐ Sucumbíos.
- ☐ Tungurahua.
- ☐ Zamora Chinchípe.

7. Area de residencia

- ☐ Urbano.
- ☐ Rural.

8. Estado civil

- ☐ Soltero
- ☐ Casado
- ☐ Divorciado
- ☐ Viudo
- ☐ Unión libre

9. Peso (Kg): \_\_\_\_\_

10. Talla (Cm): \_\_\_\_\_

11. ¿Padece alguna enfermedad?

- ☐ Si
- ☐ No

12. ¿Padece alguna de las siguientes enfermedades?

Ninguna enfermedad importante.

Diabetes tipo 1.

Diabetes tipo 2.

Cáncer.

Hipotiroidismo.

Hipertiroidismo.

Asma.

Obesidad.

Hipertensión arterial.

VIH/SIDA.

EPOC.

Trastornos de la coagulación.

Exceso de peso.

Otro

13. ¿Fumas?¿Cuántos cigarrillos fumas?

- ☐ Yo no fumo.
- ☐ Actualmente no fumo, pero solía hacerlo.
- ☐ Si fumo, menos de 5 cigarrillos al día.
- ☐ Si fumo, entre 6 y 20 cigarrillos al día.
- ☐ Si fumo, más de 21 cigarrillos al día.

14. ¿Consumes alcohol?

- ☐ Nunca.
- ☐ Sí, aproximadamente una vez cada 3 meses.
- ☐ Sí, al menos una vez al mes.
- ☐ Sí, al menos una vez por semana.
- ☐ Sí, más de una vez por semana.

15. ¿Ha padecido COVID-19?

- Si
- No

16. ¿Presentó síntomas durante su infección por COVID-19?

- Sí, tuve síntomas.
- No tuve síntomas (asintomático).

17. ¿Cómo describiría la severidad de su infección por COVID-19?

- Leve
- Moderada
- Grave
- Muy grave

18. ¿Qué tipo de tratamiento recibió para contrarrestar los signos y síntomas de la infección por COVID-19?

- Ninguno (sin atención médica ni medicación) en casa.
- Automedicación en casa.
- Medicamentos caseros recetados por un médico.
- Hospitalización por menos de 2 días.
- Hospitalización entre 3 a 7 días.
- Hospitalización por más de 7 días.
- Hospitalización en cuidados intensivos.

19. ¿Cuántas veces ha presentado infección por COVID-19?

- Una sola vez (no confirmado con pruebas de laboratorio).
- Dos veces (no confirmado con pruebas de laboratorio).
- Una sola vez (confirmado con pruebas de laboratorio PCR/Antígeno/Anticuerpos).
- Dos veces (confirmado con pruebas de laboratorio PCR/Antígeno/Anticuerpos).
- Más de dos veces.

20. En su caso, ¿Cómo se realizó el diagnóstico de infección por COVID-19?

- Con pruebas de laboratorio (PCR/test de antígenos/test de anticuerpos).
- Con visita al médico y diagnóstico (sin pruebas).
- No fue necesario ya que alguien muy cercano a mí tuvo COVID-19 y me enfermé.



- Tuve algunos síntomas característicos (pérdida del olfato, del gusto, etc.), pero no fueron confirmados mediante exploración ni criterio médico.
- Nunca me han diagnosticado la enfermedad COVID-19.

21. ¿Está vacunado para infección por COVID-19?

- Sí, dos dosis y un refuerzo.
- Sí, dos dosis y dos refuerzos.
- Sí, dos dosis.
- Sí, una sola dosis.
- No me han vacunado.

22. ¿Se infectó por COVID-19 antes de recibir cualquier vacuna de COVID-19?

- No, contraí COVID-19 antes de recibir cualquier dosis.
- Sí, después de recibir la primera dosis.
- Sí, después de recibir la segunda dosis.
- Sí, tras recibir la segunda dosis + un refuerzo.
- Sí, tras recibir la segunda dosis + el segundo refuerzo.
- Nunca me han diagnosticado la enfermedad COVID-19.

### **SECCIÓN 3: Síntomas persistentes post COVID-19**

23. ¿Usted presenta o ha presentado secuelas (efectos secundarios) a largo plazo después de la infección por COVID-19?

- ☐ Si
- ☐ No

24. Tomando como punto de referencia el momento de su contagio de COVID-19. ¿Cuánto tiempo después de la infección comenzaron las secuelas (síntomas a largo plazo)?

- ☐ Comenzaron cuando me infecté.
- ☐ Después de 3-5 semanas.
- ☐ Después de 5-7 semanas.
- ☐ Después de 7-9 semanas.
- ☐ Después de 9 semanas o más.
- ☐ Nunca me han diagnosticado la enfermedad COVID-19.

25. ¿Qué tipo de secuela (efectos secundarios a largo plazo) presenta o presentó?

- ☐ Fatiga/cansancio.
- ☐ Pérdida de memoria.
- ☐ Pérdida de cabello.
- ☐ Pérdida de vello corporal.
- ☐ Dificultad para concentrarse.
- ☐ Dificultad para expresarse o encontrar las palabras adecuadas.
- ☐ Insomnio (dificultad para dormir).
- ☐ Pérdida del olfato.
- ☐ Pérdida del gusto.
- ☐ Alteración en el sentido del gusto (cambio en la percepción de los sabores).
- ☐ Dolor de cabeza.
- ☐ Ansiedad.
- ☐ Confusión.
- ☐ Cambio de humor.
- ☐ Sensibilidad/llanto fácil.

- Alucinaciones.
- Cambios en el ritmo cardíaco.
- Palpitaciones.
- Cambios en la presión arterial.
- Dolor en el pecho.
- Tos persistente.
- Estornudo.
- Parálisis facial.
- Pérdida de apetito.
- Reflujo.
- Náuseas.
- Vómito.
- Diarrea.
- Dolor abdominal.
- Alteraciones en el ciclo menstrual.
- Disminución de la libido/deseo sexual.
- Alteración de la glucosa.
- Temblor en las extremidades.
- Fuerza disminuida.
- Dolores musculares habituales.
- Hormigueo en las extremidades.
- Pérdida de masa muscular.
- Dolores musculares inusuales.
- Picazón en la piel.
- Uñas quebradizas.
- Cabello quebradizo.
- Piel seca.
- Disminución de la agudeza visual.
- Pérdida de la audición.

- Sed.
- Sudoración excesiva.
- Escalofríos.
- Intolerancia al frío.
- Intolerancia al calor.
- Alopecia.
- Neuritis (dolor nervioso).
- Dolor o sensación de ardor en el cuerpo o en cualquier parte.
- Otro.

26. ¿Cuál ha sido la duración del síntoma o síntomas que ha sentido desde el momento en que aparecieron?

- 1 a 4 semanas.
- 4 a 8 semanas.
- 8 a 12 semanas.
- De 3 a 6 meses.
- De 6 a 12 meses.
- Más de 12 meses.

27. ¿Con qué frecuencia ocurren sus síntomas a largo plazo?

- A diario.
- Más de 3 días a la semana.
- Una vez por semana.
- Una vez cada dos semanas.
- Una vez al mes.
- No se aplica.

28. ¿Cómo ha sido el comportamiento a largo plazo de los síntomas que tuvo?

- Han empeorado desde su aparición.
- Han mejorado desde su aparición.
- Se ha mantenido constante desde su aparición.
- Ha sido intermitente (aparece y desaparece).
- No he tenido secuelas.

29. ¿Ha consultado al médico por los síntomas prolongados que ha presentado?

- ☐ Si
- ☐ No

30. ¿Ha recibido algún tratamiento específico recetado por su médico para tratar los síntomas a largo plazo?

- ☐ Si
- ☐ No

31. ¿Ha tomado algún tipo de tratamiento por su cuenta (sin prescripción médica) para tratar estos síntomas?

- ☐ Si
- ☐ No
