# Supplementary material for: Impact of COVID 19 Vaccination on Long COVID Symptoms in Ecuador a Nationwide Cross Sectional Study
Source: Research Square preprint supplement (doi:10.21203/rs.3.rs-5968498/v1), 2025-04-22
Supplement: Supplementary file 1 [file 40ed9223d418f415ffba7bbb.xlsx]

## Sheet: DATA CLEANING
N	AGE	SEX1	ETHNIC1	OCCUP1	PROV1	RESD1	MAR1	BMI1	COMB1	OBESITY	OVERW	HYPOT	HYPERT	ASTHMA	AHT	DM2	COAGULAT	SMK1	ACH1	CTREAT1	COVIDN1	VAC DOSE	VAC TIME	SEQUEAL	TIME BEGIN	ACNE	ALOPECIA	HYPOGEUSIA	ANXIETY	CHANGE OF HUMOR	BLOOD PRESSURE CHANGES	ANGINA	THIRST	ALTERATIONS IN THE MENSTRUAL CYCLE	TACHYARDIA	DIARRHEA	DYSPNOEA	DECREASED VISUAL ACUITY	DECREASED LIBIDO	CEFALEA	ALTERATIONS IN THE GLUCOSE	ALLUCINATIONS	CONFUSION	FATIGUE	MYALGIA	TREMORS	SNEEZING	REFLUX	INSOMNIA
1	47	1	0	0	0	0	0	3	1	1	0	0	0	0	0	0	0	0	0	2	0	4	1	1	0	0	0	1	0	0	0	0	0	0	0	0	0	0	0	0	0	0	0	0	0	0	0	0	0
2	41	0	0	0	0	0	1	2	0	0	1	0	0	0	0	0	0	0	2	1	0	3	0	0	1	0	0	0	0	0	0	0	0	0	0	0	0	0	0	0	0	0	0	1	0	0	0	0	0
3	59	0	0	2	0	0	1	2	1	0	1	0	0	0	0	0	0	0	0	5	2	4	0	1	0	0	0	0	0	0	0	0	0	0	0	0	0	0	0	0	0	0	0	0	0	0	0	0	0
4	53	1	0	3	1	0	1	0	1	0	0	0	0	0	0	0	0	0	0	2	2	3	0	1	1	0	0	0	0	0	0	0	0	0	0	0	0	0	0	0	0	0	0	0	0	0	0	0	0
5	26	1	0	0	0	0	0	2	0	0	1	0	0	0	0	0	0	2	3	2	1	4	0	1	0	0	0	0	0	0	0	0	0	0	0	0	0	0	0	0	0	0	0	0	0	0	0	0	0
6	24	0	0	4	0	0	0	0	0	0	0	0	0	0	0	0	0	0	2	2	2	2	0	1	0	0	0	0	0	0	0	0	0	0	0	0	0	0	0	0	0	0	0	0	0	0	0	0	0
7	19	1	0	1	0	0	0	0	0	0	0	0	0	0	0	0	0	0	3	1	0	4	0	1	1	1	0	0	0	1	0	0	1	0	0	0	0	0	0	0	0	0	0	1	0	0	0	0	1
8	19	0	0	5	0	0	0	0	0	0	0	0	0	0	0	0	0	0	0	0	0	0	0	0	0	0	0	0	0	0	0	0	0	0	0	0	0	0	0	0	0	0	0	0	0	0	0	0	0
9	19	0	0	1	0	0	1	0	1	0	0	0	0	0	0	0	0	0	0	1	0	2	2	0	0	0	0	0	0	0	0	0	0	0	0	0	0	0	0	0	0	0	0	0	0	0	0	0	0
10	19	1	0	1	0	0	0	1	0	0	0	0	0	0	0	0	0	0	0	2	0	4	1	1	1	0	0	0	0	0	0	0	0	0	0	0	0	0	0	0	0	0	1	1	0	0	0	0	1
11	20	1	0	1	0	1	0	2	1	0	1	0	0	0	0	0	0	0	0	1	0	3	0	0	0	0	0	0	0	1	0	0	0	0	0	0	0	0	0	0	0	0	0	0	0	0	0	0	1
12	20	1	0	1	3	1	0	0	0	0	0	0	0	0	0	0	0	0	2	1	1	4	1	0	0	0	0	0	0	0	0	0	0	0	0	0	0	0	0	0	0	0	0	0	0	0	0	0	0
13	22	1	0	1	0	0	0	3	1	1	0	0	0	0	0	0	0	0	1	2	2	4	3	1	0	0	1	0	0	0	0	0	0	0	0	0	0	0	0	0	0	0	0	1	0	0	0	0	0
14	54	1	0	6	0	0	1	2	1	0	1	1	0	0	0	0	0	0	0	2	1	3	3	1	1	0	0	0	0	0	0	1	0	0	0	0	0	1	0	0	0	0	0	0	0	0	0	0	0
15	26	1	0	0	4	0	0	2	0	0	1	0	0	0	0	0	0	0	0	2	2	4	0	0	0	0	0	0	0	0	0	0	0	0	0	0	0	0	0	0	0	0	0	0	0	0	0	0	0
16	25	1	0	0	5	0	0	0	0	0	0	0	0	0	0	0	0	0	1	2	1	2	3	0	0	0	0	0	0	0	0	0	0	0	0	0	0	0	0	0	0	0	0	0	0	0	0	0	0
17	25	1	0	1	4	0	0	0	1	0	0	1	0	0	0	0	0	1	1	0	1	3	0	1	1	0	1	0	0	0	0	1	0	0	0	0	0	0	0	0	0	0	0	1	0	0	0	0	1
18	25	1	0	0	4	1	0	0	1	0	0	0	0	0	0	0	0	0	0	1	1	4	0	1	0	0	0	0	0	0	1	0	0	0	0	0	0	0	0	0	0	0	0	0	0	0	0	0	0
19	57	0	0	6	4	0	1	2	0	0	1	0	0	0	0	0	0	1	0	2	1	4	4	0	0	0	0	0	0	0	0	0	0	0	0	0	0	0	0	0	0	0	0	0	0	0	0	0	0
20	45	1	0	6	4	0	1	4	1	1	0	0	0	0	0	0	0	0	1	2	1	4	4	0	0	0	0	0	0	0	0	0	0	0	0	0	0	0	0	0	0	0	0	0	0	0	0	0	0
21	19	1	0	1	0	0	0	3	0	1	0	0	0	0	0	0	0	0	1	0	0	2	0	0	0	0	0	0	0	0	0	0	0	0	0	0	0	0	0	0	0	0	0	0	0	0	0	0	0
22	20	1	0	1	0	0	0	2	1	0	1	0	0	0	0	0	0	0	1	0	1	4	1	1	0	0	0	0	1	1	1	1	0	0	0	0	0	0	0	0	0	0	0	0	0	0	0	0	1
23	20	1	0	1	0	1	0	0	0	0	0	0	0	0	0	0	0	0	0	0	0	4	0	0	1	0	0	0	0	0	0	0	0	0	0	0	0	0	0	0	0	0	0	0	0	0	0	0	0
24	21	1	0	1	0	0	0	0	0	0	0	0	0	0	0	0	0	0	2	2	1	3	0	1	1	0	0	0	1	0	0	0	0	0	0	0	0	0	0	0	0	0	0	0	0	0	0	0	0
25	20	1	0	1	0	0	0	2	0	0	1	0	0	0	0	0	0	0	1	1	0	2	0	0	0	0	0	0	0	0	0	0	0	0	0	0	0	0	0	0	0	0	0	0	0	0	0	0	0
26	21	1	0	1	0	1	0	3	1	1	0	0	0	0	0	0	0	0	1	1	2	3	0	1	0	0	0	1	0	0	0	0	1	0	0	0	0	0	0	0	0	0	0	0	0	0	0	0	0
27	30	1	0	1	0	0	1	0	0	0	0	0	0	0	0	0	0	1	1	0	0	2	0	0	0	0	0	0	0	0	0	0	0	0	0	0	0	0	0	0	0	0	0	0	0	0	0	0	0
28	22	1	0	1	0	0	0	2	1	0	1	0	0	0	0	0	0	0	0	2	1	2	0	1	1	0	1	0	0	1	0	0	1	0	0	0	0	0	0	0	0	0	0	1	1	0	0	0	1
29	20	1	0	0	0	0	0	0	0	0	0	0	0	0	0	0	0	0	1	2	0	2	1	0	1	0	1	0	0	0	0	0	0	0	0	0	0	0	0	0	0	0	0	1	0	0	0	0	0
30	20	1	0	1	0	1	0	0	0	0	0	0	0	0	0	0	0	0	0	2	1	3	1	1	0	0	0	0	0	0	0	0	0	0	0	0	0	0	0	0	0	0	0	1	0	0	0	0	0
31	19	0	0	1	0	0	0	2	0	0	1	0	0	0	0	0	0	0	3	1	0	2	1	1	1	0	1	0	0	0	0	0	0	0	0	0	0	0	0	0	0	0	0	1	0	0	0	0	1
32	22	1	0	0	0	0	0	0	1	0	0	0	0	0	0	0	0	0	1	1	1	4	0	0	0	0	0	0	0	0	0	0	0	0	0	0	0	0	0	0	0	0	0	0	0	0	0	0	0
33	19	0	0	1	0	0	0	0	0	0	0	0	0	0	0	0	0	0	0	1	0	2	0	1	0	0	0	0	0	0	0	0	0	0	0	0	0	0	0	0	0	0	0	0	0	0	0	0	0
34	49	0	0	7	0	0	1	2	0	0	1	0	0	0	0	0	0	0	0	2	0	4	0	1	0	0	0	0	0	0	0	1	1	0	0	0	0	1	0	0	0	0	0	0	0	0	0	0	0
35	19	1	1	1	0	0	0	2	0	0	1	0	0	0	0	0	0	0	0	2	0	3	0	0	0	0	0	0	0	0	0	0	0	0	0	0	0	0	0	0	0	0	0	0	0	0	0	0	0
36	21	1	0	1	6	0	0	0	0	0	0	0	0	0	0	0	0	0	1	2	1	2	0	1	1	0	0	0	1	1	0	0	0	0	0	0	0	0	0	0	0	0	0	0	0	0	0	0	1
37	21	1	0	1	0	0	0	0	0	0	0	0	0	0	0	0	0	0	0	2	1	3	0	0	0	0	0	0	0	0	0	0	0	0	0	0	0	0	0	0	0	0	0	0	0	0	0	0	0
38	24	1	0	1	0	0	0	2	1	0	1	0	0	0	0	0	0	0	0	2	0	2	1	1	0	0	0	0	0	0	0	1	0	0	0	0	0	1	0	0	0	0	0	1	1	0	0	0	1
39	19	0	0	1	0	0	0	0	0	0	0	0	0	0	0	0	0	0	0	1	0	2	1	0	0	0	0	0	0	0	0	0	0	0	0	0	0	0	0	0	0	0	0	0	0	0	0	0	0
40	37	1	0	2	0	0	1	2	1	0	1	1	0	0	0	0	0	0	1	1	1	4	1	0	0	0	0	0	0	0	0	0	0	0	0	0	0	0	0	0	0	0	0	0	0	0	0	0	0
41	20	1	0	1	0	0	0	0	1	0	0	0	0	0	0	0	0	0	0	2	0	3	2	0	0	0	0	0	0	0	0	0	0	0	0	0	0	0	0	0	0	0	0	0	0	0	0	0	0
42	20	1	0	0	0	0	0	2	1	0	1	0	0	0	0	0	0	0	1	2	0	3	0	0	0	0	0	0	0	0	0	0	0	0	0	0	0	0	0	0	0	0	0	0	0	0	0	0	0
43	43	1	0	2	0	0	1	2	1	0	1	0	0	1	0	0	0	0	0	0	0	4	3	0	0	0	0	0	0	0	0	0	0	0	0	0	0	0	0	0	0	0	0	0	0	0	0	0	0
44	20	1	0	1	0	1	0	2	0	0	1	0	0	0	0	0	0	0	1	1	0	4	0	1	1	0	0	0	0	0	0	1	0	0	0	0	0	0	0	0	0	0	0	0	0	0	0	0	0
45	68	1	0	2	0	0	0	3	1	1	0	0	0	0	0	1	0	0	0	1	0	4	2	0	0	0	0	0	0	0	0	0	0	0	0	0	0	0	0	0	0	0	0	0	0	0	0	0	0
46	40	1	0	7	0	0	2	2	1	0	1	0	0	0	0	0	0	0	0	2	0	2	0	1	0	0	0	0	0	1	0	0	0	1	0	1	0	1	0	0	1	0	0	1	0	0	0	0	1
47	19	1	0	1	0	1	0	0	0	0	0	0	0	0	0	0	0	0	1	1	0	3	0	0	0	0	0	0	0	0	0	0	0	0	0	0	0	0	0	0	0	0	0	0	0	0	0	0	0
48	20	0	0	1	0	1	0	0	0	0	0	0	0	0	0	0	0	0	0	0	0	2	0	0	0	0	0	0	0	0	0	0	0	0	0	0	0	0	0	0	0	0	0	0	0	0	0	0	0
49	20	1	0	1	0	0	0	2	0	0	1	0	0	0	0	0	0	1	1	0	0	4	0	0	0	0	0	0	0	0	0	0	0	0	0	0	0	0	0	0	0	0	0	0	0	0	0	0	0
50	19	0	0	1	0	0	0	0	0	0	0	0	0	0	0	0	0	0	0	0	0	2	0	0	0	0	0	0	0	0	0	0	0	0	0	0	0	0	0	0	0	0	0	0	0	0	0	0	0
51	50	1	0	2	0	0	3	2	0	0	1	0	0	0	0	0	0	0	0	2	1	3	2	0	0	0	0	0	0	0	0	0	0	0	0	0	0	0	0	0	0	0	0	0	0	0	0	0	0
52	21	1	0	1	0	0	0	4	1	1	0	0	0	0	0	0	0	0	2	1	1	3	0	1	0	0	0	0	0	1	0	0	0	0	0	0	0	0	0	0	0	0	0	1	0	0	0	0	0
53	64	0	0	5	0	0	1	2	1	0	1	0	0	0	0	0	0	0	1	1	0	3	0	0	1	0	0	0	0	0	0	0	0	0	0	0	0	0	0	0	0	0	0	0	0	0	0	0	0
54	21	1	0	1	7	0	1	0	0	0	0	0	0	0	0	0	0	1	2	2	0	3	2	0	0	0	0	0	0	0	0	0	0	0	0	0	0	0	0	0	0	0	0	0	0	0	0	0	0
55	21	1	0	1	7	0	0	3	0	1	0	0	0	0	0	0	0	0	2	2	2	3	0	0	0	0	0	0	0	0	0	0	0	0	0	0	0	0	0	0	0	0	0	0	0	0	0	0	0
56	21	1	0	1	7	0	0	0	0	0	0	0	0	0	0	0	0	0	1	0	0	3	0	0	0	0	0	0	0	0	0	0	0	0	0	0	0	0	0	0	0	0	0	0	0	0	0	0	0
57	31	1	0	4	7	0	0	4	0	1	0	0	0	0	0	0	0	0	1	1	1	3	0	0	0	0	0	0	0	0	0	0	0	0	0	0	0	0	0	0	0	0	0	0	0	0	0	0	0
58	30	0	0	5	0	0	1	2	0	0	1	0	0	0	0	0	0	1	1	2	2	2	2	0	0	0	0	0	0	0	0	0	0	0	0	0	0	0	0	0	0	0	0	0	0	0	0	0	0
59	19	0	0	1	0	0	0	0	0	0	0	0	0	0	0	0	0	0	2	2	1	1	0	0	0	0	0	0	0	0	0	0	0	0	0	0	0	0	0	0	0	0	0	0	0	0	0	0	0
60	19	1	0	6	4	0	1	0	1	0	0	0	0	0	0	0	0	0	1	1	0	4	1	0	0	0	0	0	0	0	0	0	0	0	0	0	0	0	0	0	0	0	0	0	0	0	0	0	0
61	52	0	0	5	1	0	2	2	0	0	1	0	0	0	0	0	0	2	1	0	0	3	2	1	0	0	0	0	0	1	0	0	0	0	0	0	0	1	0	0	0	0	0	0	0	0	0	0	0
62	33	0	0	1	1	0	0	2	0	0	1	0	0	0	0	0	0	0	2	2	0	3	0	0	0	0	0	0	0	0	0	0	0	0	0	0	0	0	0	0	0	0	0	0	0	0	0	0	0
63	34	1	0	4	7	0	1	0	1	0	0	0	0	0	0	0	0	0	3	2	1	4	1	1	1	0	0	0	1	0	0	0	0	0	0	0	0	0	0	0	0	0	0	1	0	0	0	0	0
64	52	0	0	5	1	0	1	3	0	1	0	0	0	0	0	0	0	0	1	2	1	4	3	0	0	0	0	0	0	0	1	0	0	0	0	0	0	0	0	0	0	0	0	1	0	0	0	0	0
65	40	0	0	5	1	0	1	2	0	0	1	0	0	0	0	0	0	0	0	4	0	4	0	1	1	0	0	0	0	0	0	0	0	0	0	0	0	0	0	0	0	0	0	1	0	0	0	0	1
66	31	1	0	5	1	0	1	0	0	0	0	0	0	0	0	0	0	0	0	2	0	4	3	0	0	0	0	0	0	0	0	0	0	0	0	0	0	0	0	0	0	0	0	0	0	0	0	0	0
67	45	0	0	5	1	0	1	0	0	0	0	0	0	0	0	0	0	1	1	2	1	2	2	0	0	0	0	0	0	0	0	0	0	0	0	0	0	0	0	0	0	0	0	0	0	0	0	0	0
68	32	1	0	5	1	0	1	0	0	0	0	0	0	0	0	0	0	1	2	2	0	4	2	0	1	0	0	0	0	0	0	0	0	0	0	0	0	0	0	0	0	0	0	0	0	0	0	0	0
69	58	0	0	4	5	0	1	0	1	0	0	0	0	0	0	0	0	0	1	0	0	4	1	0	0	0	0	0	0	0	0	0	0	0	0	0	0	0	0	0	0	0	0	1	0	0	0	0	0
70	27	1	0	4	1	0	1	0	0	0	0	0	0	0	0	0	0	0	2	1	1	3	1	1	1	1	0	0	0	0	0	0	0	0	0	0	0	0	0	0	0	0	0	0	0	0	0	0	0
71	30	0	0	5	7	0	1	2	0	0	1	0	0	0	0	0	0	0	2	0	0	2	0	0	0	0	0	0	0	0	0	0	0	0	0	0	0	0	0	0	0	0	0	0	0	0	0	0	0
72	22	0	0	1	7	0	0	2	1	0	1	0	0	0	0	0	0	0	2	1	0	3	0	0	0	0	0	0	0	0	0	0	0	0	0	0	0	0	0	0	0	0	0	0	0	0	0	0	0
73	30	0	0	1	0	0	0	0	0	0	0	0	0	0	0	0	0	0	2	2	0	3	0	0	0	0	0	0	0	0	0	0	0	0	0	0	0	0	0	0	0	0	0	0	0	0	0	0	0
74	32	0	0	5	1	0	1	2	0	0	1	0	0	0	0	0	0	2	2	2	0	3	1	0	0	0	0	0	0	0	0	0	0	0	0	0	0	0	0	0	0	0	0	0	0	0	0	0	0
75	29	1	0	8	5	0	0	0	1	0	0	0	0	0	0	0	0	0	1	2	1	2	0	1	1	0	0	0	0	0	0	0	0	0	0	0	0	0	0	0	0	0	0	1	0	0	0	0	0
76	27	0	0	4	5	0	0	2	0	0	1	0	0	0	0	0	0	1	1	1	0	0	0	0	0	0	0	0	0	0	0	0	0	0	0	0	0	0	0	0	0	0	0	0	0	0	0	0	0
77	21	0	0	9	7	0	1	0	1	0	0	0	0	1	0	0	0	0	2	2	2	2	0	1	0	0	1	0	1	1	1	1	0	0	0	0	0	0	0	0	0	0	0	0	0	0	0	0	0
78	21	1	0	1	7	0	0	0	0	0	0	0	0	0	0	0	0	2	3	0	1	4	0	1	0	0	0	1	0	0	0	1	0	0	1	0	0	0	0	0	0	0	0	1	1	0	0	0	0
79	20	0	0	1	7	0	0	0	0	0	0	0	0	0	0	0	0	0	2	0	1	2	0	0	1	0	0	0	0	0	0	0	0	0	0	0	0	0	0	0	0	0	0	0	0	0	0	0	0
80	21	0	0	6	7	0	0	2	0	0	1	0	0	0	0	0	0	0	2	2	2	2	0	1	0	0	0	0	0	0	1	0	0	0	0	0	0	0	0	0	0	0	0	0	0	0	0	0	0
81	61	0	0	9	0	0	1	2	1	0	1	0	0	0	1	0	0	0	2	2	0	2	1	0	1	0	0	0	0	0	0	0	0	0	0	0	0	0	0	0	0	0	0	0	0	0	0	0	0
82	51	1	0	7	0	0	1	2	1	0	1	0	0	0	0	0	0	0	0	1	0	2	1	1	1	0	0	0	1	0	0	0	0	0	1	0	1	1	1	1	0	0	0	1	1	0	1	0	0
83	51	1	0	7	4	0	1	0	1	0	0	1	0	0	0	0	0	0	0	2	2	4	0	1	1	0	0	0	0	0	0	0	0	0	0	0	0	0	0	0	0	0	0	0	0	0	0	0	1
84	21	0	0	10	1	0	1	2	0	0	1	0	0	0	0	0	0	0	3	1	2	2	1	1	1	0	0	0	0	0	0	0	0	0	0	0	0	0	0	0	0	0	0	1	0	0	1	0	0
85	21	1	0	0	1	0	0	0	0	0	0	0	0	0	0	0	0	0	2	2	0	4	1	1	1	0	1	0	0	0	0	0	0	1	0	0	1	0	0	1	0	0	0	0	0	0	0	0	0
86	21	1	0	0	7	0	0	0	0	0	0	0	0	0	0	0	0	0	2	2	2	4	1	1	1	0	1	0	0	0	0	0	0	0	1	0	0	0	0	0	0	0	0	1	0	1	0	0	0
87	21	0	0	0	1	1	0	0	0	0	0	0	0	0	0	0	0	0	0	2	0	4	0	1	1	0	0	0	0	0	0	0	0	0	0	0	0	0	0	0	0	0	0	0	0	0	0	0	0
88	51	1	0	6	1	1	1	2	0	0	1	0	0	0	0	0	0	0	0	2	1	3	1	1	1	0	0	1	0	0	0	0	0	0	0	0	0	0	0	0	0	0	0	1	0	0	1	0	0
89	21	1	0	0	1	0	1	0	0	0	0	0	0	0	0	0	0	0	0	1	1	4	0	1	1	0	0	1	0	0	0	0	0	0	0	0	0	0	0	0	0	0	0	0	0	0	1	0	0
90	31	0	0	0	8	0	0	2	1	0	1	0	0	0	0	0	0	2	3	1	0	4	1	1	1	0	0	1	0	0	0	1	0	0	0	0	0	0	0	1	0	0	0	0	0	0	0	0	0
91	31	1	0	0	1	0	0	0	0	0	0	0	0	0	0	0	0	0	1	2	0	3	1	0	1	0	0	0	0	0	0	0	0	0	0	0	0	0	0	0	0	0	0	0	0	0	0	0	0
92	21	1	0	0	5	0	0	0	0	0	0	0	0	0	0	0	0	0	1	2	1	3	0	0	1	0	0	0	0	0	0	0	0	0	0	0	0	0	0	0	0	0	0	0	0	0	0	0	0
93	21	1	0	1	1	0	0	0	0	0	0	0	0	0	0	0	0	0	2	2	0	4	1	1	1	0	0	1	0	0	0	0	0	0	0	0	0	0	0	0	0	0	0	0	0	0	0	0	0
94	21	1	0	6	7	1	0	0	0	0	0	0	0	0	0	0	0	0	2	2	0	3	1	1	1	0	0	1	1	1	0	1	1	0	1	0	1	0	0	0	0	1	0	1	1	1	0	0	1
95	21	1	0	1	7	0	0	0	0	0	0	0	0	0	0	0	0	0	2	2	1	3	1	1	1	0	0	1	0	0	0	0	0	0	0	0	0	0	0	0	0	0	0	0	1	0	0	0	0
96	51	0	0	9	0	0	1	0	0	0	0	0	0	0	0	0	0	0	2	1	0	2	0	1	1	0	0	1	0	1	0	0	0	0	0	0	0	0	0	0	0	0	0	0	0	0	0	0	1
97	21	1	0	6	1	0	1	0	1	0	0	0	1	0	0	0	0	0	0	2	0	3	0	1	0	0	0	0	1	1	0	0	0	0	1	0	0	0	0	0	0	0	0	0	0	1	1	0	1
98	31	1	0	6	5	0	1	0	0	0	0	0	0	0	0	0	0	0	2	2	0	2	0	1	1	0	1	0	0	1	0	0	0	1	0	0	0	0	1	1	0	0	0	0	1	0	0	1	1
99	21	1	1	6	5	1	0	0	0	0	0	0	0	0	0	0	0	2	3	2	1	4	0	1	1	0	0	1	1	0	0	0	0	0	0	0	0	0	0	0	0	0	0	0	0	0	0	0	0
100	21	0	0	9	3	0	0	1	0	0	0	0	0	0	0	0	0	2	3	2	1	2	0	1	1	0	0	0	0	0	0	0	0	0	0	0	1	0	0	0	0	0	0	0	0	0	0	0	0
101	61	0	0	10	0	0	1	2	0	0	1	0	0	0	0	0	0	0	2	2	0	4	0	1	1	0	0	1	0	0	0	0	0	0	0	1	0	0	0	0	0	0	0	0	1	0	0	0	0
102	21	1	0	0	0	1	0	0	1	0	0	1	0	0	0	0	0	0	2	2	1	3	1	1	1	0	0	0	1	1	0	1	0	0	0	0	0	0	0	1	0	0	0	0	1	1	1	1	0
103	21	1	0	9	4	0	1	2	0	0	1	0	0	0	0	0	0	0	1	2	1	3	0	1	1	0	1	0	1	1	0	0	1	1	1	1	1	1	0	1	0	0	0	0	0	0	0	0	0
104	21	1	0	6	5	0	0	2	0	0	1	0	0	0	0	0	0	0	2	2	1	4	0	1	1	0	0	1	0	0	0	0	0	0	0	0	0	0	0	1	1	0	0	0	1	0	0	0	0
105	21	1	0	6	4	0	0	2	0	0	1	0	0	0	0	0	0	2	1	2	0	2	1	1	1	0	0	0	0	0	0	0	0	0	1	0	0	0	0	0	0	0	0	1	0	0	1	0	1
106	21	1	0	0	4	1	0	0	0	0	0	0	0	0	0	0	0	0	2	2	1	4	0	1	1	0	0	1	0	0	0	0	0	0	0	0	0	0	0	0	0	0	0	0	0	0	0	0	0
107	51	0	1	9	4	0	1	2	1	0	1	0	0	0	0	0	0	0	0	2	2	3	1	1	0	0	0	0	0	0	0	0	0	0	0	0	0	0	0	0	0	0	0	0	0	0	0	0	0
108	21	1	0	1	4	0	0	0	0	0	0	0	0	0	0	0	0	0	2	0	0	2	1	0	1	0	0	0	0	0	0	0	0	0	0	0	0	0	0	0	0	0	0	0	0	0	0	0	0
109	31	0	1	10	0	0	1	3	1	1	0	0	0	0	0	0	0	2	3	2	0	3	0	1	0	0	0	0	1	1	0	0	0	0	1	0	1	0	1	0	0	1	0	1	0	0	0	0	1
110	31	1	0	9	0	0	1	2	1	0	1	0	0	0	0	0	0	2	2	2	1	3	0	1	1	0	0	0	1	0	0	0	0	0	0	0	0	0	0	1	0	0	0	0	0	0	0	0	1
111	20	1	0	1	0	0	0	2	0	0	1	0	0	0	0	0	0	2	1	1	0	3	0	1	0	0	0	0	0	0	0	1	1	0	0	0	1	0	0	0	0	0	0	1	0	0	1	0	0
112	21	0	0	0	0	0	1	0	0	0	0	0	0	0	0	0	0	2	3	0	1	4	0	1	0	0	0	0	0	0	0	0	0	0	0	1	0	0	0	0	0	0	0	0	0	0	0	0	0
113	41	1	0	6	0	0	1	0	0	0	0	0	0	0	0	0	0	0	0	1	0	3	0	1	1	0	0	1	1	0	0	1	0	0	0	0	1	0	0	0	0	0	0	1	0	0	1	0	0
114	51	1	0	0	0	0	1	2	1	0	1	0	0	0	0	0	0	0	0	2	0	3	0	1	1	0	1	0	0	0	0	1	0	0	0	0	0	0	0	1	0	0	0	0	0	0	0	1	0
115	21	1	1	0	7	0	0	0	0	0	0	0	0	0	0	0	0	0	1	1	1	4	1	1	1	0	0	0	0	0	0	0	0	0	0	0	0	0	0	1	0	0	0	0	1	0	0	0	0
116	21	1	0	1	0	0	0	0	1	0	0	0	0	0	0	0	1	0	3	5	2	3	0	1	1	0	0	0	1	1	1	0	1	1	1	0	1	0	1	0	1	1	1	1	1	1	1	1	1
117	51	1	0	7	1	0	1	3	1	1	0	0	0	0	0	0	0	0	1	3	1	4	1	1	1	0	0	1	1	0	1	1	0	0	0	0	0	0	0	1	0	0	0	0	1	0	0	0	1
118	31	1	0	6	5	0	0	3	1	1	0	0	0	0	0	0	0	0	0	2	0	2	0	1	1	0	0	1	1	1	0	0	0	1	0	0	1	1	0	1	0	0	0	1	1	1	1	0	1
119	51	1	0	7	5	0	1	3	1	1	0	0	0	0	0	0	0	0	0	2	1	2	1	1	0	0	0	0	0	0	0	0	0	0	0	0	0	0	0	1	0	0	0	0	0	0	0	0	0
120	21	1	0	6	7	1	0	0	0	0	0	0	0	0	0	0	0	0	1	2	2	2	1	1	1	0	0	1	1	0	0	0	0	1	0	0	0	0	0	0	0	0	0	0	0	0	0	0	0
121	21	1	0	0	7	0	0	0	0	0	0	0	0	0	0	0	0	0	2	1	1	4	1	1	1	0	0	0	0	0	0	0	0	0	0	0	0	0	0	0	0	0	0	1	0	0	0	0	1
122	21	0	0	6	7	0	0	0	1	0	0	0	0	1	0	0	0	0	2	2	2	2	0	1	0	0	0	0	0	0	0	0	0	0	0	0	1	0	0	0	0	0	0	0	1	0	0	0	0
123	81	1	0	7	7	1	3	2	1	0	1	0	0	0	0	0	1	0	0	0	0	4	1	0	1	0	0	0	0	0	0	0	0	0	0	0	0	0	0	0	0	0	0	0	0	0	0	0	0
124	71	1	0	7	0	1	3	0	0	0	0	0	0	0	0	0	0	0	0	0	0	4	0	0	1	0	0	0	0	0	0	0	0	0	0	0	0	0	0	0	0	0	0	0	0	0	0	0	0
125	51	1	0	9	0	0	1	2	1	0	1	1	0	0	0	0	0	0	0	0	0	2	1	0	1	0	0	0	0	0	0	0	0	0	0	0	0	0	0	0	0	0	0	0	0	0	0	0	0
126	21	0	0	6	4	0	1	2	1	0	1	0	0	0	0	0	0	0	2	2	0	2	0	1	1	0	0	1	0	0	0	0	0	0	0	0	0	0	0	0	0	0	0	0	1	0	0	0	0
127	21	1	0	6	1	0	0	0	0	0	0	0	0	0	0	0	0	0	2	2	2	4	0	1	1	0	0	1	1	1	0	0	1	1	0	1	0	0	0	1	0	0	0	1	0	1	1	0	0
128	21	0	0	1	1	0	0	0	0	0	0	0	0	0	0	0	0	0	0	2	1	3	0	1	0	0	0	1	0	0	0	0	0	0	0	0	1	0	0	0	0	0	0	0	0	0	0	0	0
129	41	1	0	6	7	0	0	0	0	0	0	0	0	0	0	0	0	0	0	2	0	4	1	1	0	0	0	0	1	1	0	0	0	0	0	0	0	0	0	0	0	0	0	1	1	0	0	0	0
130	31	1	0	9	1	0	1	0	1	0	0	0	0	0	0	0	1	0	0	2	1	3	1	1	1	0	0	1	0	1	0	0	0	0	1	0	1	0	0	0	1	0	0	1	0	1	1	0	0
131	21	0	0	7	1	0	0	2	0	0	1	0	0	0	0	0	0	0	0	0	0	2	0	0	1	0	0	0	0	0	0	0	0	0	0	0	0	0	0	0	0	0	0	0	0	0	0	0	0
132	21	0	0	7	1	0	0	2	0	0	1	0	0	0	0	0	0	0	0	0	0	2	0	0	1	0	0	0	0	0	0	0	0	0	0	0	0	0	0	0	0	0	0	0	0	0	0	0	0
133	31	1	0	0	8	0	1	0	0	0	0	0	0	0	0	0	0	0	1	2	0	4	0	1	1	0	1	0	0	0	0	0	0	0	0	0	0	0	0	1	0	0	0	1	0	0	0	0	0
134	21	0	0	6	1	0	0	2	1	0	1	1	0	0	0	0	0	0	3	1	0	3	1	0	1	0	0	0	0	0	0	0	0	0	0	0	0	0	0	0	0	0	0	0	0	0	0	0	0
135	31	0	0	10	5	0	0	0	0	0	0	0	0	0	0	0	0	2	2	2	1	3	1	1	1	0	0	0	0	0	0	0	0	0	0	1	0	0	0	0	0	0	0	0	1	1	0	0	0
136	41	1	1	10	1	0	1	3	1	1	0	0	0	0	0	0	0	0	0	0	0	2	0	1	1	0	0	1	1	0	0	0	0	1	0	0	0	0	0	0	0	0	0	0	0	0	0	0	1
137	20	0	0	1	7	0	0	0	0	0	0	0	0	0	0	0	0	0	0	1	1	3	1	1	1	0	0	0	0	0	0	0	0	0	0	0	0	0	0	0	0	0	0	0	0	0	1	0	0
138	20	1	0	1	7	0	0	0	0	0	0	0	0	0	0	0	0	0	2	2	1	1	1	1	1	0	0	1	0	1	0	1	0	0	0	0	0	0	0	0	0	0	0	0	0	0	0	0	1
139	21	0	0	0	0	0	0	0	0	0	0	0	0	0	0	0	0	0	1	2	0	3	0	1	1	0	0	0	0	1	0	0	0	0	0	0	0	0	0	1	0	0	1	0	0	0	0	0	0
140	31	0	0	10	1	0	0	0	0	0	0	0	0	0	0	0	0	0	3	0	1	3	1	1	1	0	0	0	0	0	0	0	0	0	0	0	0	0	0	0	0	0	0	0	0	0	0	0	0
141	21	0	0	0	5	0	0	3	1	3	0	0	0	0	0	0	0	0	3	2	0	4	1	1	1	0	0	0	0	0	0	0	1	0	0	1	1	0	0	1	0	0	0	1	0	1	1	0	0
142	31	0	0	9	5	0	0	2	0	0	1	0	0	0	0	0	0	0	2	2	0	3	1	1	1	0	0	0	0	0	0	0	0	0	0	0	0	0	0	0	0	0	0	1	0	0	1	0	0
143	31	0	0	10	3	0	0	2	0	0	1	0	0	0	0	0	0	0	2	2	2	3	0	1	1	0	0	1	1	0	0	0	1	0	1	0	1	0	0	0	0	0	0	0	0	0	0	0	0
144	31	0	0	6	0	0	0	0	1	0	0	0	0	0	0	0	0	0	2	1	0	2	0	1	1	0	0	1	0	0	0	0	0	0	0	0	0	0	0	0	0	0	0	0	0	0	0	0	0
145	21	0	0	9	0	0	4	2	0	0	1	0	0	0	0	0	0	0	1	2	0	4	0	1	1	0	0	1	0	0	0	0	0	0	0	0	0	0	0	0	1	0	0	0	1	0	1	0	0
146	21	1	0	0	4	0	1	0	0	0	0	0	0	0	0	0	0	0	2	2	1	3	1	0	1	0	0	0	0	0	0	0	0	0	0	0	0	0	0	0	0	0	0	0	0	0	0	0	0
147	21	1	1	0	5	0	0	2	0	0	1	0	0	0	0	0	0	2	3	2	2	4	1	1	1	0	0	1	0	0	0	0	0	0	0	0	0	0	0	0	0	0	0	0	0	0	0	0	0
148	51	0	0	6	4	0	1	2	0	0	1	0	0	0	0	0	0	0	0	2	0	3	1	1	1	0	0	1	0	0	0	0	0	0	0	0	0	0	0	0	0	0	1	1	0	0	1	0	0
149	51	1	0	7	4	0	1	2	1	0	1	0	0	0	1	0	0	0	0	2	0	4	0	0	1	0	0	0	0	0	0	0	0	0	0	0	0	0	0	0	0	0	0	0	0	0	0	0	0
150	31	0	1	10	4	0	1	3	1	1	0	0	0	0	0	0	0	2	3	2	0	3	0	1	0	0	0	0	1	1	0	0	0	0	1	0	1	0	1	0	0	1	0	1	0	0	0	0	1
151	31	1	0	9	4	0	1	2	1	0	1	0	0	0	0	0	0	2	2	2	1	3	0	1	1	0	0	0	1	0	0	0	0	0	0	0	0	0	0	1	0	0	0	0	0	0	0	0	1
152	20	1	0	1	0	0	0	2	0	0	1	0	0	0	0	0	0	2	1	1	0	3	0	1	0	0	0	0	0	0	0	1	1	0	0	0	1	0	0	0	0	0	0	1	0	0	1	0	0
153	21	0	0	0	0	0	1	0	0	0	0	0	0	0	0	0	0	2	3	0	1	4	0	1	0	0	0	0	0	0	0	0	0	0	0	1	0	0	0	0	0	0	0	0	0	0	0	0	0
154	41	1	0	6	0	0	1	0	0	0	0	0	0	0	0	0	0	0	0	1	0	3	0	1	1	0	0	1	1	0	0	1	0	0	0	0	1	0	0	0	0	0	0	1	0	0	1	0	0
155	51	1	0	0	0	0	1	2	1	0	1	0	0	0	0	0	0	0	0	2	0	3	0	1	1	0	1	0	0	0	0	1	0	0	0	0	0	0	0	1	0	0	0	0	0	0	0	1	0
156	21	1	1	0	0	0	0	0	0	0	0	0	0	0	0	0	0	0	1	1	1	4	1	1	1	0	0	0	0	0	0	0	0	0	0	0	0	0	0	1	0	0	0	0	1	0	0	0	0
157	21	1	0	1	0	0	0	0	1	0	0	0	0	0	0	0	1	0	3	5	2	3	0	1	1	0	0	0	1	1	1	0	1	1	1	0	1	0	1	0	1	1	1	1	1	1	1	1	1
158	51	1	0	7	7	0	1	3	1	1	0	0	0	0	0	0	0	0	1	3	1	4	1	1	1	0	0	1	1	0	1	1	0	0	0	0	0	0	0	1	0	0	0	0	1	0	0	0	1
159	31	1	0	6	0	0	0	3	1	1	0	0	0	0	0	0	0	0	0	2	0	2	0	1	1	0	0	1	1	1	0	0	0	1	0	0	1	1	0	1	0	0	0	1	1	1	1	0	1
160	51	1	0	7	1	0	1	3	1	1	0	0	0	0	0	0	0	0	0	2	1	2	1	1	0	0	0	0	0	0	0	0	0	0	0	0	0	0	0	1	0	0	0	0	0	0	0	0	0
161	21	1	0	6	5	0	0	0	0	0	0	0	0	0	0	0	0	0	1	2	2	2	1	1	1	0	0	1	1	0	0	0	0	1	0	0	0	0	0	0	0	0	0	0	0	0	0	0	0
162	21	1	0	0	5	0	0	0	0	0	0	0	0	0	0	0	0	0	2	1	1	4	1	1	1	0	0	0	0	0	0	0	0	0	0	0	0	0	0	0	0	0	0	1	0	0	0	0	1
163	21	0	0	6	7	1	0	0	1	0	0	0	0	1	0	0	0	0	2	2	2	2	0	1	0	0	0	0	0	0	0	0	0	0	0	0	1	0	0	0	0	0	0	0	1	0	0	0	0
164	81	1	0	7	7	1	1	2	1	0	1	0	0	0	0	0	1	0	0	0	0	4	1	0	1	0	0	0	0	0	0	0	0	0	0	0	0	0	0	0	0	0	0	0	0	0	0	0	0
165	71	1	0	7	7	0	1	0	0	0	0	0	0	0	0	0	0	0	0	0	0	4	0	0	1	0	0	0	0	0	0	0	0	0	0	0	0	0	0	0	0	0	0	0	0	0	0	0	0
166	51	1	0	9	7	0	1	2	1	0	1	1	0	0	0	0	0	0	0	0	0	2	1	0	1	0	0	0	0	0	0	0	0	0	0	0	0	0	0	0	0	0	0	0	0	0	0	0	0
167	21	0	0	6	0	0	1	2	1	0	1	0	0	0	0	0	0	0	2	2	0	2	0	1	1	0	0	1	0	0	0	0	0	0	0	0	0	0	0	0	0	0	0	0	1	0	0	0	0
168	21	1	0	6	0	0	0	0	0	0	0	0	0	0	0	0	0	0	2	2	2	4	0	1	1	0	0	1	1	1	0	0	1	1	0	1	0	0	0	1	0	0	0	1	0	1	1	0	0
169	21	0	0	1	4	0	0	0	0	0	0	0	0	0	0	0	0	0	0	2	1	3	0	1	0	0	0	1	0	0	0	0	0	0	0	0	1	0	0	0	0	0	0	0	0	0	0	0	0
170	41	1	0	6	1	1	0	0	0	0	0	0	0	0	0	0	0	0	0	2	0	4	1	1	0	0	0	0	1	1	0	0	0	0	0	0	0	0	0	0	0	0	0	1	1	0	0	0	0
171	31	1	0	9	1	0	1	0	1	0	0	0	0	0	0	0	1	0	0	2	1	3	1	1	1	0	0	1	0	1	0	0	0	0	1	0	1	0	0	0	1	0	0	1	0	1	1	0	0
172	21	0	0	7	7	0	0	2	0	0	1	0	0	0	0	0	0	0	0	0	0	2	0	0	1	0	0	0	0	0	0	0	0	0	0	0	0	0	0	0	0	0	0	0	0	0	0	0	0
173	21	0	0	7	1	0	0	2	0	0	1	0	0	0	0	0	0	0	0	0	0	2	0	0	1	0	0	0	0	0	0	0	0	0	0	0	0	0	0	0	0	0	0	0	0	0	0	0	0
174	31	1	0	0	1	0	1	0	0	0	0	0	0	0	0	0	0	0	1	2	0	4	0	1	1	0	1	0	0	0	0	0	0	0	0	0	0	0	0	1	0	0	0	1	0	0	0	0	0
175	21	0	0	6	1	1	0	2	1	0	1	1	0	0	0	0	0	0	3	1	0	3	1	0	1	0	0	0	0	0	0	0	0	0	0	0	0	0	0	0	0	0	0	0	0	0	0	0	0
176	31	0	0	10	1	0	0	0	0	0	0	0	0	0	0	0	0	2	2	2	1	3	1	1	1	0	0	0	0	0	0	0	0	0	0	1	0	0	0	0	0	0	0	0	1	1	0	0	0
177	41	1	1	10	1	0	1	3	1	1	0	0	0	0	0	0	0	0	0	0	0	2	0	1	1	0	0	1	1	0	0	0	0	1	0	0	0	0	0	0	0	0	0	0	0	0	0	0	1
178	20	0	0	1	5	1	0	0	0	0	0	0	0	0	0	0	0	0	0	1	1	3	1	1	1	0	0	0	0	0	0	0	0	0	0	0	0	0	0	0	0	0	0	0	0	0	1	0	0
179	20	1	0	1	1	0	0	0	0	0	0	0	0	0	0	0	0	0	2	2	1	1	1	1	1	0	0	1	0	1	0	1	0	0	0	0	0	0	0	0	0	0	0	0	0	0	0	0	1
180	21	0	0	0	7	0	0	0	0	0	0	0	0	0	0	0	0	0	1	2	0	3	0	1	1	0	0	0	0	1	0	0	0	0	0	0	0	0	0	1	0	0	1	0	0	0	0	0	0
181	31	0	0	10	7	0	0	0	0	0	0	0	0	0	0	0	0	0	3	0	1	3	1	1	1	0	0	0	0	0	0	0	0	0	0	0	0	0	0	0	0	0	0	0	0	0	0	0	0
182	21	0	0	0	2	1	0	3	1	1	0	0	0	0	0	0	0	0	3	2	0	4	1	1	1	0	0	0	0	0	0	0	1	0	0	1	1	0	0	1	0	0	0	1	0	1	1	0	0
183	31	0	0	9	1	0	0	2	0	0	1	0	0	0	0	0	0	0	2	2	0	3	1	1	1	0	0	0	0	0	0	0	0	0	0	0	0	0	0	0	0	0	0	1	0	0	1	0	0
184	31	0	0	10	5	0	0	2	0	0	1	0	0	0	0	0	0	0	2	2	2	3	0	1	1	0	0	1	1	0	0	0	1	0	1	0	1	0	0	0	0	0	0	0	0	0	0	0	0
185	31	0	0	6	5	0	0	0	1	0	0	0	0	0	0	0	0	0	2	1	0	2	0	1	1	0	0	1	0	0	0	0	0	0	0	0	0	0	0	0	0	0	0	0	0	0	0	0	0
186	21	0	0	9	3	0	4	2	0	0	1	0	0	0	0	0	0	0	1	2	0	4	0	1	1	0	0	1	0	0	0	0	0	0	0	0	0	0	0	0	1	0	0	0	1	0	1	0	0
187	21	1	0	0	0	0	1	0	0	0	0	0	0	0	0	0	0	0	2	2	1	3	1	0	1	0	0	0	0	0	0	0	0	0	0	0	0	0	0	0	0	0	0	0	0	0	0	0	0
188	21	1	1	0	0	0	0	2	0	0	1	0	0	0	0	0	0	2	3	2	2	4	1	1	1	0	0	1	0	0	0	0	0	0	0	0	0	0	0	0	0	0	0	0	0	0	0	0	0
189	51	0	0	6	4	0	1	2	0	0	1	0	0	0	0	0	0	0	0	2	0	3	1	1	1	0	0	1	0	0	0	0	0	0	0	0	0	0	0	0	0	0	1	1	0	0	1	0	0
190	51	1	0	7	5	0	1	2	1	0	1	0	0	0	1	0	0	0	0	2	0	4	0	0	1	0	0	0	0	0	0	0	0	0	0	0	0	0	0	0	0	0	0	0	0	0	0	0	0
191	27	0	0	4	5	0	0	2	0	0	1	0	0	0	0	0	0	1	1	0	0	0	0	0	0	0	0	0	0	0	0	0	0	0	0	0	0	0	0	0	0	0	0	0	0	0	0	0	0
192	26	0	0	0	2	0	0	0	0	0	0	0	0	0	0	0	0	0	3	0	0	4	0	0	0	0	0	0	0	0	0	0	0	0	0	0	0	0	0	0	0	0	0	0	0	0	0	0	0
193	25	1	0	0	2	0	0	0	0	0	0	0	0	0	0	0	0	0	3	1	0	4	1	1	1	0	0	1	0	0	0	0	0	0	0	0	0	0	0	0	0	0	0	1	0	0	0	0	0
194	26	1	0	0	2	0	0	0	0	0	0	0	0	0	0	0	0	1	3	3	0	2	2	1	0	0	1	0	1	0	0	0	0	1	0	0	0	0	0	0	0	0	0	1	0	0	0	0	0
195	27	1	0	0	2	0	0	0	1	0	0	0	0	0	0	0	0	0	1	1	0	4	2	0	0	0	0	0	0	0	0	0	0	0	0	0	0	0	0	0	0	0	0	0	0	0	0	0	0
196	24	1	0	0	2	0	0	0	0	0	0	0	0	0	0	0	0	0	2	1	0	4	2	1	0	0	0	0	0	0	0	0	0	0	0	0	0	0	0	0	0	0	0	0	0	0	0	0	0
197	23	1	0	0	2	0	0	0	0	0	0	0	0	0	0	0	0	0	2	1	1	4	2	0	1	0	0	0	1	0	0	0	0	0	0	0	0	0	0	0	0	0	0	0	0	0	0	0	0
198	29	1	0	4	5	0	0	0	0	0	0	0	0	0	0	0	0	0	1	1	0	2	0	0	0	0	0	0	0	0	0	0	0	0	0	0	0	0	0	0	0	0	0	0	0	0	0	0	0
199	29	1	0	6	5	0	0	0	1	0	0	0	0	0	0	0	0	0	1	1	0	0	0	0	0	0	0	0	0	0	0	0	0	0	0	0	0	0	0	0	0	0	0	0	0	0	0	0	0
200	25	0	0	0	1	0	0	0	0	0	0	0	0	0	0	0	0	0	2	1	0	4	1	1	0	0	1	1	1	1	0	0	0	0	0	0	0	0	0	1	0	0	0	1	0	0	0	0	1
201	19	1	0	1	5	0	0	0	0	0	0	0	0	0	0	0	0	0	0	1	2	2	0	0	0	0	0	0	0	0	0	0	0	0	0	0	0	0	0	0	0	0	0	1	0	0	0	0	0
202	19	1	0	1	5	0	0	0	0	0	0	0	0	0	0	0	0	0	0	1	2	4	0	0	0	0	0	0	0	0	0	0	0	0	0	0	0	0	0	0	0	0	0	0	0	0	0	0	0
202
[truncated: 9 more columns]

## Sheet: CODES
VARIABLES CODES
SEX
Male	0
Female	1
ETHNIC GROUP
Mixed	0
White	1
OCCUPATION
Healthcare professionals.	0
Student.	1
Educational instruction.	2
Biological scientists, chemists and related occupations.	3
Management and business.	4
Architecture and engineering.	5
Clerks and administrative support.	6
Unemployment and Retirement.	7
Occupations in production processes.	8
Social and community workers.	9
Agricultural, fishing and forestry occupations.	10
PROVINCE
Loja.	0
Pichincha.	1
Galápagos.	2
Zamora Chinchípe.	3
Cañar.	4
Azuay.	5
Morona Santiago.	6
Guayas.	7
Chimborazo.	8
RESIDENCE
Urban	0
Rural	1
MARITAL STATUS
Single	0
Married	1
Divorced	2
Widowed	3
De facto union	4
BMI
Normal	0
Underweight	1
Overweight	2
Obesity I	3
Obesity ii	4
COMORBITIES
No	0
Yes	1
OBESITY
No	0
Yes	1
OVERWEIGHT
No	0
Yes	1
HYPOTIROIDISM
No	0
Yes	1
HYPERTIROIDISM
No	0
Yes	1
ASTHMA
No	0
Yes	1
ARTERIAL HYPERTENSION
No	0
Yes	1
DIABETES MELLITUS 2
No	0
Yes	1
COAGULATION DISORDERS
No	0
Yes	1
SMOKING
I do not smoke	0
I don't currently smoke, but I used to.	1
If I smoke, less than 5 cigarettes a day.	2
DRINKING ALCOHOL
Never.	0
Yes, about once every 3 months.	1
Yes, at least once a month.	2
Yes, at least once a week.	3
COVID-19 TREATMENT
None (no medical care or medication) at home.	0
Self-medication at home.	1
Home medication prescribed by a doctor.	2
Hospitalization for less than 3 days.	3
Hospitalization for more than 3 days.	4
Hospitalization in intensive care.	5
NUMER OF INFECTIONS WITH COVID-19
Once	0
Twice	1
More than twice	2
NUMER OF COVID-19 VACCINES DOSES
None	0
One dose	1
Two doses	2
Two doses and one reboost	3
Two doses and two reboost	4
TIMING OF COVID-19 INFECTION
Before any COVID-19 vaccine dose	0
After one dose of COVID-19 vaccine	1
After two doses of COVID-19 vaccine	2
After two doses + one booster of COVID-19 vaccine	3
After two doses + two boosters of COVID-19 vaccine	4
COVID-19 SEQUEALES
No	0
Yes	1
SEQUALES INTIATE RIGH AFTER COVID-19 INFECTION
No	0
Yes	1
TYPE OF SEQUEALE
ACNE
No	0
Yes	1
ALOPECIA
No	0
Yes	1
HYPOGEUSIA
No	0
Yes	1
ANXIETY
No	0
Yes	1
CHANGE OF HUMOR
No	0
Yes	1
BLOOD PRESSURE CHANGES
No	0
Yes	1
ANGINA
No	0
Yes	1
THIRST
No	0
Yes	1
ALTERATIONS IN THE MENSTRUAL CYCLE
No	0
Yes	1
TACHYARDIA
No	0
Yes	1
DIARRHEA
No	0
Yes	1
DYSPNOEA
No	0
Yes	1
DECREASED VISUAL ACUITY
No	0
Yes	1
DECREASED LIBIDO
No	0
Yes	1
CEFALEA
No	0
Yes	1
ALTERATIONS IN THE GLUCOSE
No	0
Yes	1
ALLUCINATIONS
No	0
Yes	1
CONFUSION
No	0
Yes	1
FATIGUE
No	0
Yes	1
MYALGIA
No	0
Yes	1
TREMORS
No	0
Yes	1
SNEEZING
No	0
Yes	1
REFLUX
No	0
Yes	1
INSOMNIA
No	0
Yes	1
HYPERHIDROSIS
No	0
Yes	1
COUGHING
No	0
Yes	1
NAUSEA/VOMITING
No	0
Yes	1
ABDOMINAL PAIN
No	0
Yes	1
HYPOSMIA
No	0
Yes	1
EASY CRYING
No	0
Yes	1
DURATION OF SEQUEALES
No symptoms	0
Between 1 to 4 weeks	1
Between 4 to 8 weeks	2
Between 8 to 12 weeks	3
More that 12 weeks	4
FREQUENCY OF SYMPTOMS
No symptoms	0
Daily	1
Three days a week	2
Once a week	3
Once every two weeks	4
Once a month	5
EVOLUTION OF SYMTOMS
No symptoms	0
Is getting better	1
It is the same	2
It is intermittent	3
It is worse	4
